# Supplementary material for: Dilithio-1,1,2-tris(diphenylphosphinoyl)ethane-1,2-diide: the first formal 1,2-dicarbanion stabilised by phosphorus?
Source: Royal Society of Chemistry journal article supplement (doi:10.1039/b206963f), 2002-01-01
Supplement: b206963f.doc [file b206963f.doc]

# Supplementary data

Table 1. Atomic coordinates and equivalent isotropic displacement parameters (Å2)

for **1**. Ueq is defined as one third of the trace of the orthogonalized Uij tensor.

x y z Ueq

Li(1) 0.4742(4) 0.3993(4) 0.5044(3) 0.0220(11)

Li(2) 0.5363(4) 0.4688(3) 0.6167(3) 0.0180(10)

P(1) 0.52877(5) 0.35294(5) 0.37531(4) 0.01284(16)

P(2) 0.69388(5) 0.39616(5) 0.52410(4) 0.01248(16)

P(3) 0.68712(5) 0.53105(5) 0.41805(4) 0.01263(16)

O(1) 0.46484(14) 0.41358(13) 0.40868(10) 0.0155(4)

O(2) 0.59818(14) 0.40238(13) 0.55185(10) 0.0170(4)

O(3) 0.59252(14) 0.57600(13) 0.42188(10) 0.0157(4)

C(1) 0.6459(2) 0.37525(18) 0.38614(15) 0.0152(6)

C(2) 0.6972(2) 0.42858(17) 0.44195(15) 0.0133(5)

C(3) 0.4956(2) 0.25098(18) 0.40762(14) 0.0168(6)

C(4) 0.5603(2) 0.1858(2) 0.41069(16) 0.0222(7)

C(5) 0.5379(3) 0.1083(2) 0.43384(18) 0.0282(8)

C(6) 0.4505(3) 0.0952(2) 0.45542(17) 0.0295(8)

C(7) 0.3858(3) 0.1594(2) 0.45335(17) 0.0276(8)

C(8) 0.4078(2) 0.2368(2) 0.42927(16) 0.0213(7)

C(9) 0.4864(2) 0.34201(18) 0.28453(15) 0.0168(6)

C(10) 0.5368(2) 0.3780(2) 0.23632(16) 0.0236(7)

C(11) 0.5014(3) 0.3743(2) 0.16751(17) 0.0301(8)

C(12) 0.4162(3) 0.3358(2) 0.14578(18) 0.0332(8)

C(13) 0.3647(3) 0.3010(2) 0.19290(18) 0.0328(8)

C(14) 0.3997(2) 0.3038(2) 0.26163(16) 0.0239(7)

C(15) 0.7812(2) 0.44890(19) 0.58516(15) 0.0161(6)

C(16) 0.7583(2) 0.5251(2) 0.61221(17) 0.0218(7)

C(17) 0.8252(3) 0.5672(2) 0.65735(18) 0.0276(7)

C(18) 0.9146(3) 0.5339(2) 0.67671(19) 0.0319(8)

C(19) 0.9375(2) 0.4578(2) 0.65144(19) 0.0305(8)

C(20) 0.8712(2) 0.4159(2) 0.60535(17) 0.0235(7)

C(21) 0.7288(2) 0.28782(18) 0.52728(15) 0.0164(6)

C(22) 0.7945(2) 0.2581(2) 0.48652(17) 0.0213(7)

C(23) 0.8218(2) 0.1756(2) 0.4906(2) 0.0298(8)

C(24) 0.7854(3) 0.1226(2) 0.5351(2) 0.0351(9)

C(25) 0.7206(3) 0.1512(2) 0.5752(2) 0.0311(8)

C(26) 0.6915(2) 0.2339(2) 0.57075(16) 0.0216(7)

C(27) 0.7805(2) 0.59798(19) 0.46041(15) 0.0161(6)

C(28) 0.7592(2) 0.6806(2) 0.47186(17) 0.0218(7)

C(29) 0.8306(3) 0.7344(2) 0.4997(2) 0.0304(8)

C(30) 0.9230(3) 0.7068(2) 0.51589(19) 0.0303(8)

C(31) 0.9447(2) 0.6253(2) 0.50461(18) 0.0269(7)

C(32) 0.8743(2) 0.5711(2) 0.47676(17) 0.0226(7)

C(33) 0.7098(2) 0.53493(19) 0.33037(15) 0.0163(6)

C(34) 0.7865(2) 0.4924(2) 0.30922(17) 0.0233(7)

C(35) 0.8015(3) 0.4950(2) 0.24150(18) 0.0295(8)

C(36) 0.7405(3) 0.5396(2) 0.19465(18) 0.0297(8)

C(37) 0.6655(3) 0.5826(2) 0.21519(17) 0.0282(8)

C(38) 0.6509(2) 0.5807(2) 0.28314(16) 0.0214(7)

O(4) 0.58750(17) 0.43306(14) 0.70730(11) 0.0242(5)

C(39) 0.6508(3) 0.4694(2) 0.76176(19) 0.0328(8)

C(40) 0.7311(3) 0.4073(3) 0.7795(2) 0.0423(10)

C(41) 0.6912(3) 0.3262(3) 0.7480(2) 0.0371(9)

C(42) 0.5886(3) 0.3460(2) 0.72216(19) 0.0288(8)

C(43) 1.0595(3) 0.2692(3) 0.7846(2) 0.0370(9)

C(44) 1.1174(3) 0.2822(3) 0.7353(2) 0.0413(10)

C(45) 1.0865(3) 0.2612(3) 0.6691(2) 0.0454(11)

C(46) 0.9978(3) 0.2269(3) 0.6521(2) 0.0447(10)

C(47) 0.9399(3) 0.2145(2) 0.7015(2) 0.0367(9)

C(48) 0.9697(3) 0.2354(2) 0.7686(2) 0.0324(8)

C(49) 0.9071(3) 0.2206(3) 0.8231(3) 0.0516(12)

C(50) 1.0657(6) 0.0481(5) 0.5163(8) 0.136(7)

C(51) 1.0710(6) 0.0345(6) 0.5858(7) 0.145(6)

C(52) 1.0120(7) 0.0238(7) 0.6102(5) 0.102(5)

C(53) 0.9478(6) 0.0685(5) 0.5650(5) 0.067(3)

C(54) 0.9426(6) 0.0550(6) 0.4954(5) 0.064(4)

C(55) 1.0015(7) 0.0033(6) 0.4711(5) 0.101(4)

C(56) 0.9958(11) 0.0179(9) 0.3960(6) 0.176(9)

**Electronic structure calculations on 3:**

Geometry optimization of **3** was carried out at the Hartree-Fock/6-31+G* level of theory. (Clark, T.; Chandrasekhar, J.; Spitznagel, K.; Schleyer, P. v. R. *J. Comput. Chem.* **1983**, *4*, 294.)

Atomic coordinates and final energy for **3**:

COORDINATES OF ALL ATOMS (Å):

ATOM CHARGE X Y Z

------------------------------------------------------------

C1 6.0 0.0037435182 0.0898877832 -0.3204594401

C2 6.0 -0.3169875900 -1.2665137111 0.2725619511

H5 1.0 -0.3617436723 -2.1261116580 -0.3976776652

P1 15.0 1.6626394299 0.5570541940 -0.4733472124

P2 15.0 -1.3404536474 0.9667241397 -0.9528315487

P3 15.0 -0.1738551231 -1.7547102263 1.9045753498

O1 8.0 -1.0126535098 -2.9170847081 2.3711371191

O2 8.0 2.4956377927 0.8045216271 0.7549058353

O3 8.0 -1.1287412790 2.2931297813 -1.6286374459

C3 6.0 -2.2639180771 -0.1221607652 -2.1296557181

H2 1.0 -1.6568735391 -0.2436906873 -3.0238930917

H6 1.0 -3.2099318187 0.3366202236 -2.4170771887

H8 1.0 -2.4460483576 -1.0974052127 -1.6946228642

C4 6.0 -2.6337422838 1.1845428806 0.3422944199

H10 1.0 -2.2690056349 1.9021613501 1.0713829044

H11 1.0 -2.8466486272 0.2494243940 0.8437635598

H13 1.0 -3.5437033771 1.5810978627 -0.1074130888

C5 6.0 2.5388467549 -0.7514468537 -1.4430395350

H9 1.0 3.6062704320 -0.5408314565 -1.4909613819

H14 1.0 2.1389141120 -0.8272341025 -2.4520267988

H15 1.0 2.3918617336 -1.7026882497 -0.9446766120

C6 6.0 1.8701076995 2.0076256158 -1.5860260661

H7 1.0 2.9387376356 2.1997047806 -1.6738684039

H16 1.0 1.3861836344 2.8731942673 -1.1544841736

H17 1.0 1.4383791237 1.8513158177 -2.5674281893

C7 6.0 -0.4155772613 -0.2780630382 2.9763871837

H4 1.0 0.2168933362 0.5382035856 2.6480290486

H18 1.0 -0.1736205172 -0.5359411337 4.0065140998

H19 1.0 -1.4540644278 0.0351378146 2.9364803034

C8 6.0 1.5602772060 -2.1986937747 2.4274605322

H12 1.0 2.2539636149 -1.3982826206 2.1938391919

H20 1.0 1.8565778939 -3.0924904369 1.8792182013

H21 1.0 1.6049707907 -2.4305867808 3.4936787221

NUCLEAR ENERGY = 1429.7322841492 au

ELECTRONIC ENERGY = -2990.4308089730 au

TOTAL ENERGY = -1560.6985248238 au
